# Supplementary material for: MG53 is not a critical regulator of insulin signaling pathway in skeletal muscle
Source: PubMed Central journal article supplement (PMC7875368; doi:10.1371/journal.pone.0245179), 2021-02-10

Fig 2B

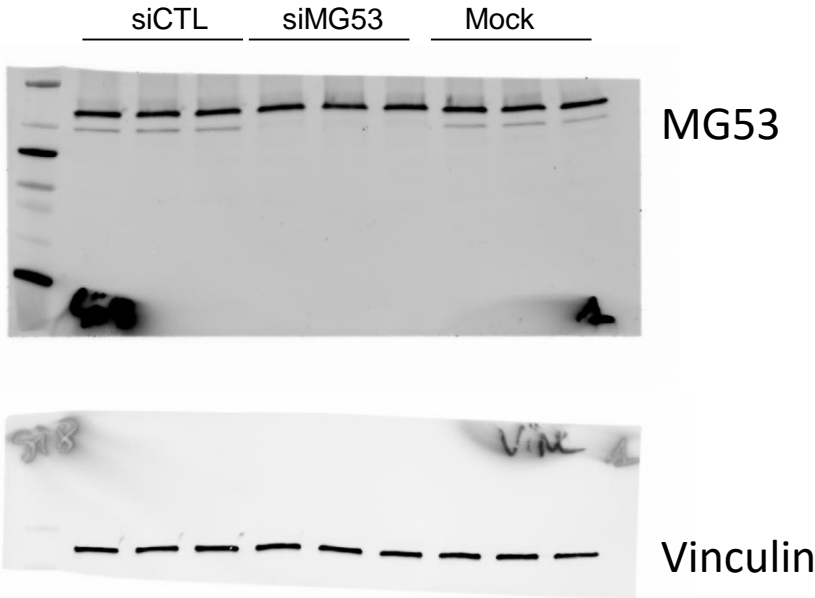

Fig 2C

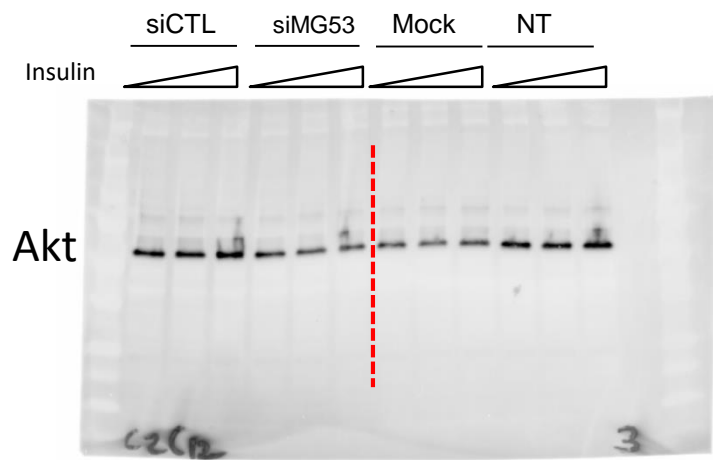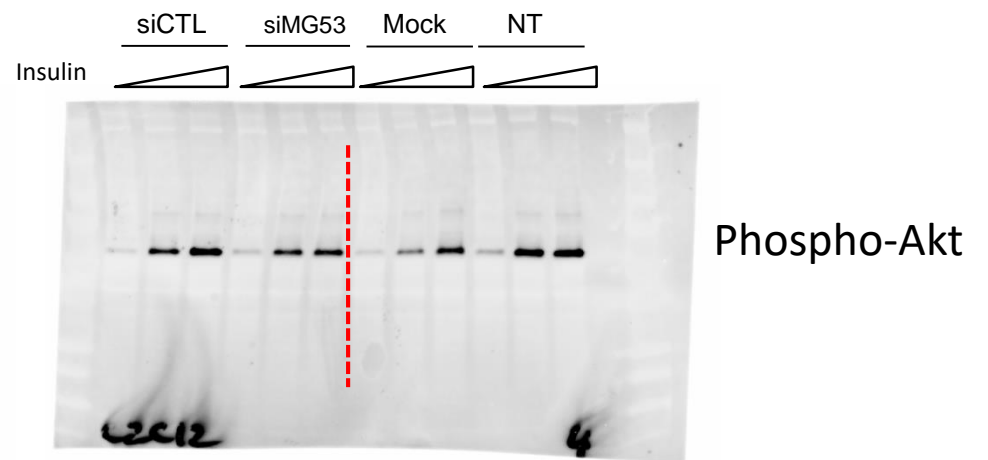

# C2C12 (Fig 3A)

|                 | 1 h |   |   |   | 4 h |   |   |   |
|-----------------|-----|---|---|---|-----|---|---|---|
| hMG53 (30μg/ml) | -   | + | - | + | -   | + | - | + |
| Insulin         | -   | - | + | + | -   | - | + | + |

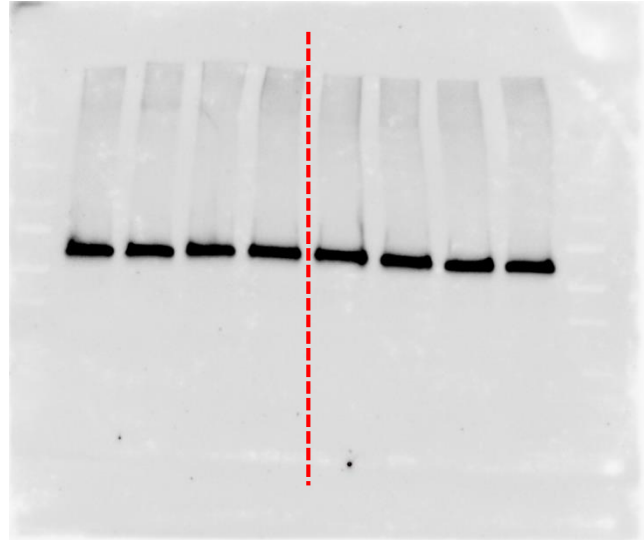

AKT

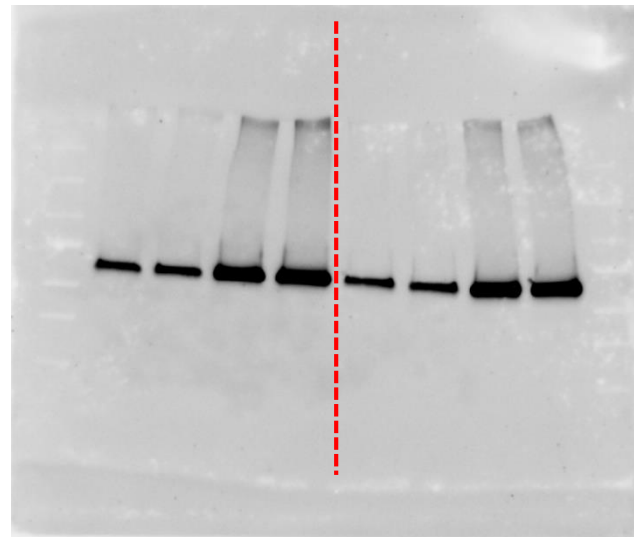

Phospho-AKT

# HSMMs Fig 3B

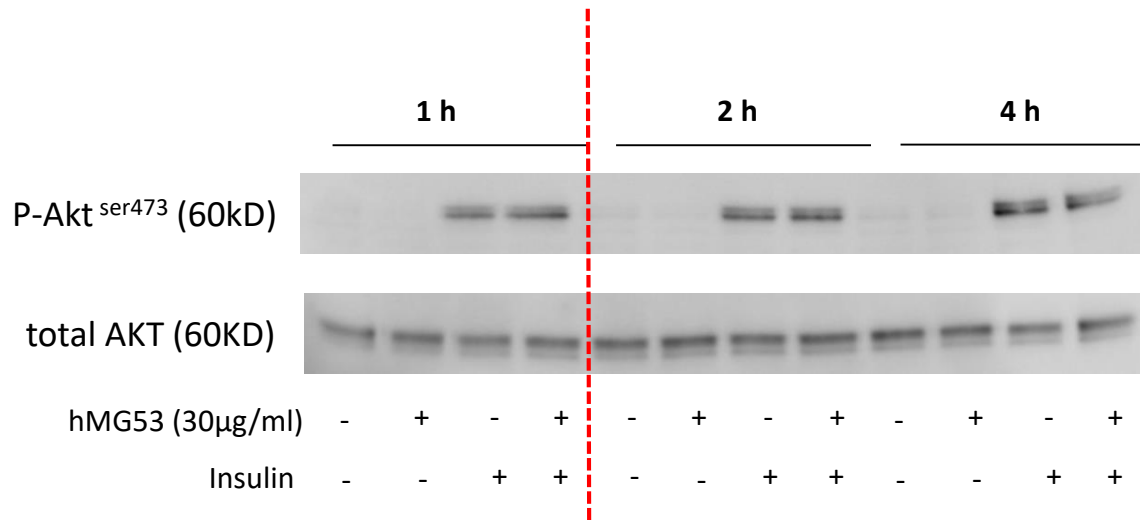

Fig4

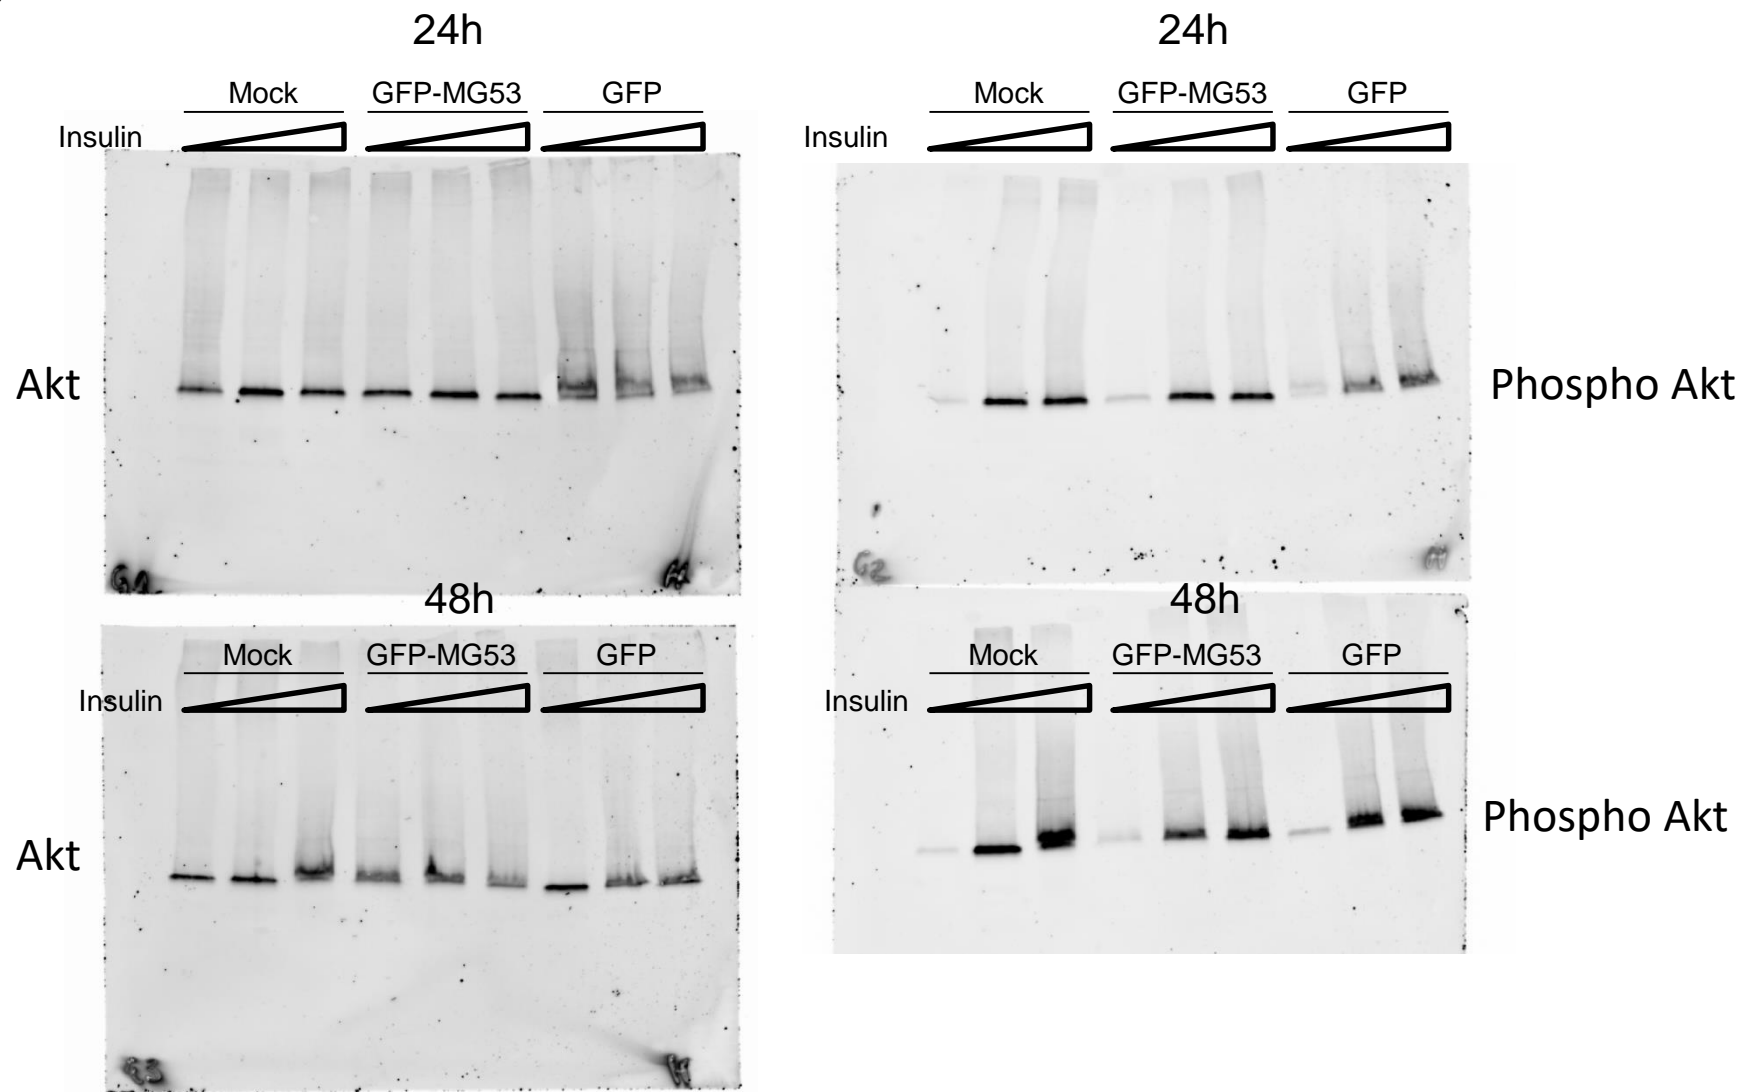

Fig4

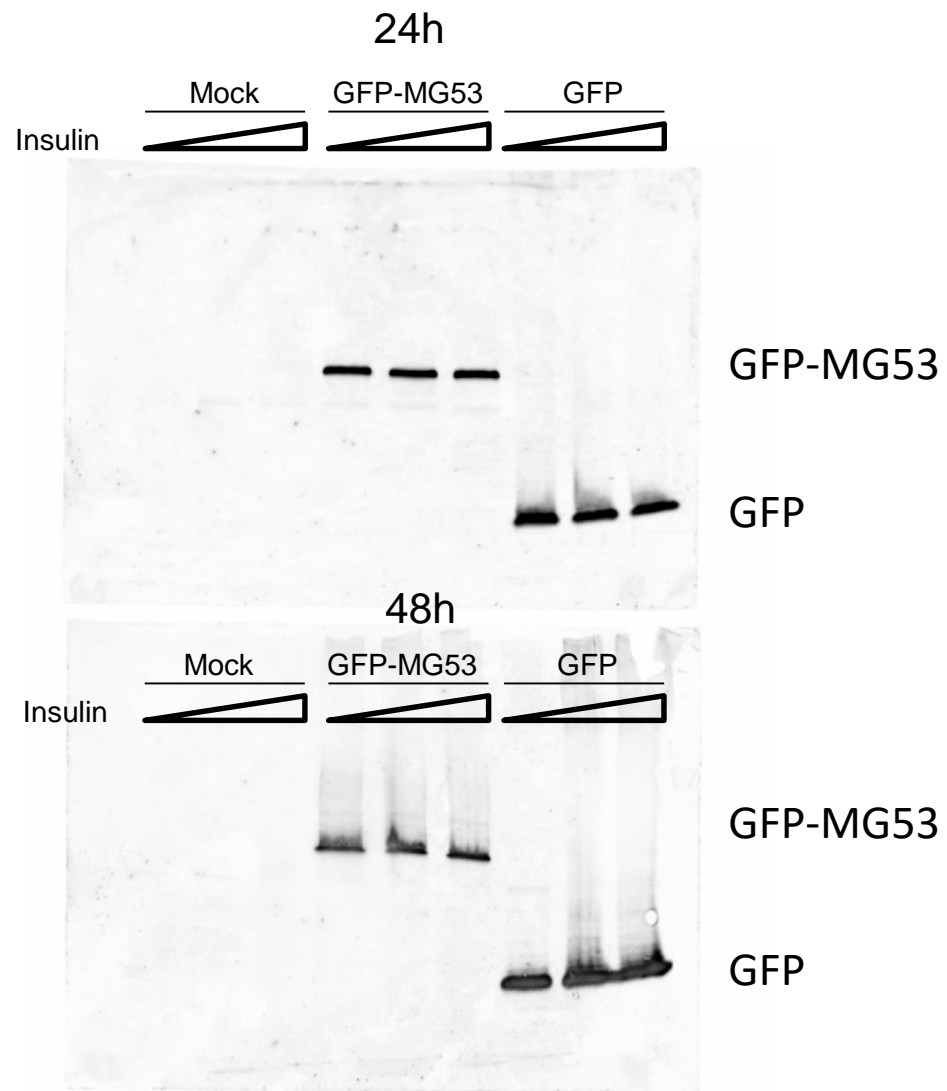

Fig5

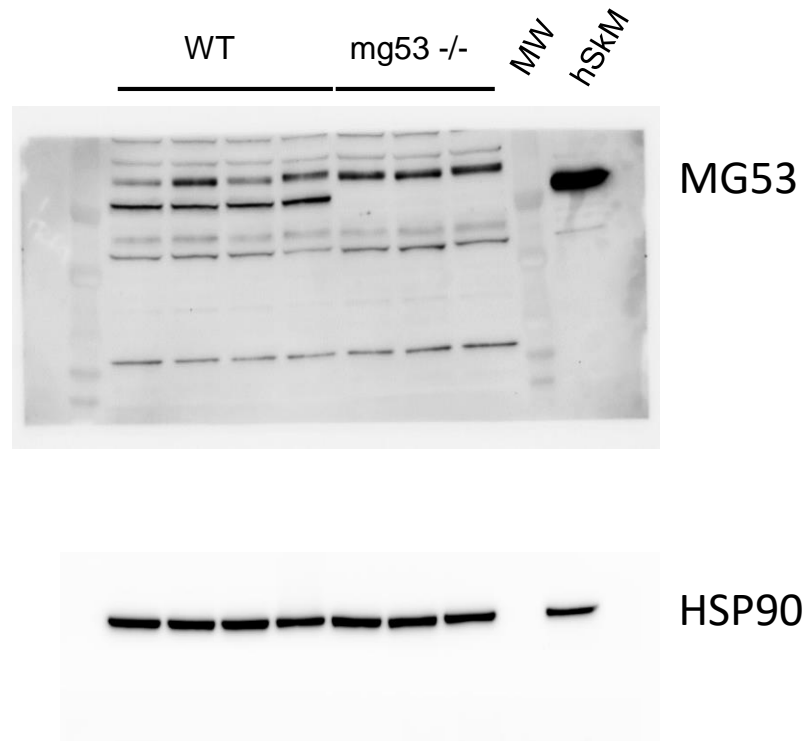

Supplement: pone.0245179.s001.pdf [file pone.0245179.s001.pdf]
